# Supplementary material for: Application of a Combined Adsorption−Ozonation Process for Phenolic Wastewater Treatment in a Continuous Fixed-Bed Reactor
Source: MDPI journal article supplement (doi:10.3390/catal11081014), 2021-08-22
Supplement: s1 [file s1]

## Supplementary Material

# Application of combined adsorption–ozonation process for phenolic wastewater treatment in a continuous fixed-bed reactor

**Cristian Ferreiro <sup>1,\*</sup>, Ana de Luis <sup>2</sup>, Natalia Villota <sup>3</sup>, Jose María Lomas <sup>3</sup>, José Ignacio Lombrana <sup>1</sup> and Luis Miguel Camarero <sup>3</sup>**

<sup>1</sup> Department of Chemical Engineering, Faculty of Science and Technology, University of the Basque Country UPV/EHU, Barrio Sarriena s/n, 48940 Leioa, Spain; ji.lombrana@ehu.eus

<sup>2</sup> Department of Chemical and Environmental Engineering, Faculty of Engineering in Bilbao, University of the Basque Country UPV/EHU, Plaza Ingeniero Torres Quevedo, 1, 48013 Bilbao, Spain, ana.deluis@ehu.eus

<sup>3</sup> Department of Environmental and Chemical Engineering, Faculty of Engineering of Vitoria-Gasteiz, University of the Basque Country UPV/EHU, 01006 Vitoria-Gasteiz (Spain); natalia.villota@ehu.eus (N.V.); josemaria.lomas@ehu.eus (J.M.L.); luismiguel.camarero@ehu.eus (L.M.C.)

\* Correspondence: cristian.ferreiro@ehu.eus; Tel.: +34-946-012-512

## 1. State of the art

**Table S1.** Previous studies on the treatment of wastewater through catalytic ozonation processes in the presence of activated carbon.

| Pollutant                                                                    | Operating conditions                                                                                                                | Comments                                                                                                                                                                                                                                                                                              | Ref. |
|------------------------------------------------------------------------------|-------------------------------------------------------------------------------------------------------------------------------------|-------------------------------------------------------------------------------------------------------------------------------------------------------------------------------------------------------------------------------------------------------------------------------------------------------|------|
| Acid blue 9,<br>mordant black 11,<br>reactive blue 19,<br>reactive orange 16 | Fixed-bed reactor ( $100 \times 6$ cm);<br>$m_{\text{CAT}} = 200$ g; $F_G = 30$ g $\text{O}_3$ $\text{h}^{-1}$ ;<br>Neutral pH      | Complete colour removal and a significant decrease in chemical oxygen demand (COD) were obtained in contrast to ozone treatment alone.                                                                                                                                                                | [1]  |
| 1,2-dihydroxybenzene                                                         | Fixed-bed reactor; $m_{\text{CAT}} = 2$ g;<br>$F_G = 6$ mmol $\text{O}_3$ $\text{min}^{-1}$ ; pH = 8                                | Ozonation combined with adsorption on activated carbon was shown effective to remove 1,2-dihydroxybenzene in 60 minutes.                                                                                                                                                                              | [2]  |
| Chlorophyll <i>a</i>                                                         | Fixed-bed reactor; $m_{\text{CAT}} = 2.1$ kg;<br>$F_G = 5.0$ g $\text{O}_3$ $\text{h}^{-1}$ ; pH = 8.5                              | Catalytic ozonation with activated carbon was able to remove more than 95% of the chlorophyll <i>a</i> and reduce 76% of the COD in only 30 min.                                                                                                                                                      | [3]  |
| Natural organic matter (NOM)                                                 | Slurry-type reactor;<br>$m_{\text{CAT}} = 0.5$ g $\text{L}^{-1}$ ;<br>$\text{CO}_{3,\text{G}} = 60$ mg $\text{L}^{-1}$ ; pH = 7 / 9 | The efficiency of the $\text{O}_3/\text{GAC}$ , $\text{O}_3/\text{OH}^-$ , and $\text{O}_3/\text{H}_2\text{O}_2$ systems for the removal of natural organic matter was compared. The same removal efficiency was obtained.                                                                            | [4]  |
| Polyphenols                                                                  | Semibatch reactor;<br>$M_{\text{CAT}} = 0.5$ g $\text{L}^{-1}$ ;<br>$F_G = 0.15$ L $\text{O}_3$ $\text{min}^{-1}$ ; pH = 3 – 7      | Ozonisation processes alone and combined ( $\text{O}_3/\text{AC}$ ) were compared. It was observed that the ozonisation process with activated carbon improved significantly the primary degradation and mineralisation. The consumption of ozone was reduced via the $\text{O}_3/\text{AC}$ process. | [5]  |
| Carbamazepine and atrazine                                                   | Slurry-type reactor;<br>$M_{\text{CAT}} = 0.1$ g $\text{L}^{-1}$ ;<br>$\text{CO}_{3,\text{G}} = 10$ mg $\text{L}^{-1}$ ; pH = 7.3   | Powdered activated carbon catalysed ozonation was more efficient for the removal of ozonation-resistant organics pollutants than ozone alone.                                                                                                                                                         | [6]  |

## 2. Experimental system characterisation

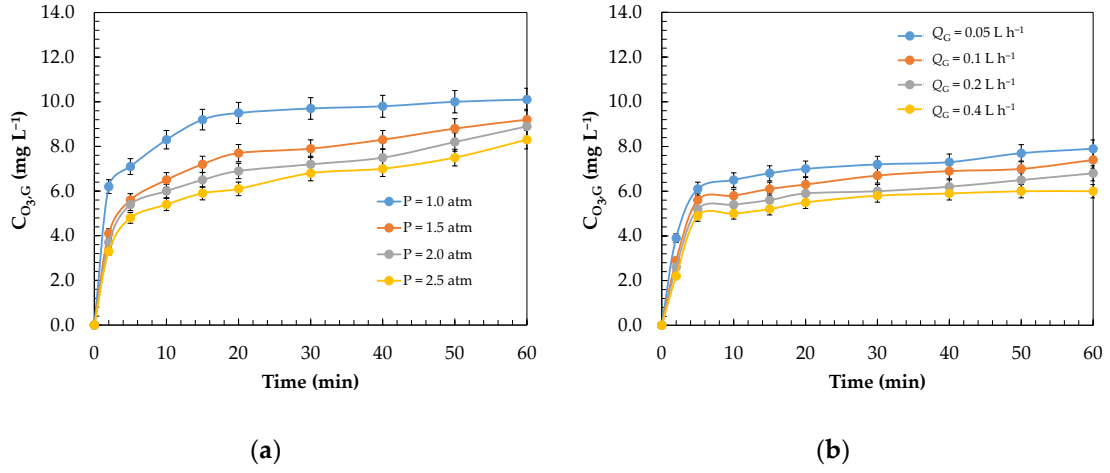

**Figure S1.** Evolution of ozone concentration at the reactor outlet gas stream. Effect of: (a) Pressure<sup>1</sup>; (b) Ozone flow rate<sup>2</sup>. Experimental conditions: <sup>1</sup>  $C_{P_0} = 250.0$  mg L<sup>-1</sup>, pH = 11.0,  $C_{O_3,G} = 12.0$  mg L<sup>-1</sup>,  $Q_L = 12$  mL min<sup>-1</sup>,  $Q_G = 0.05$  L h<sup>-1</sup>,  $V = 0.14$  L. <sup>2</sup>  $C_{P_0} = 250.0$  mg L<sup>-1</sup>,  $P = 2.5$  atm, pH = 11.0;  $C_{O_3,G} = 19.0$  mg L<sup>-1</sup>,  $Q_L = 12$  mL min<sup>-1</sup>,  $V = 0.14$  L.

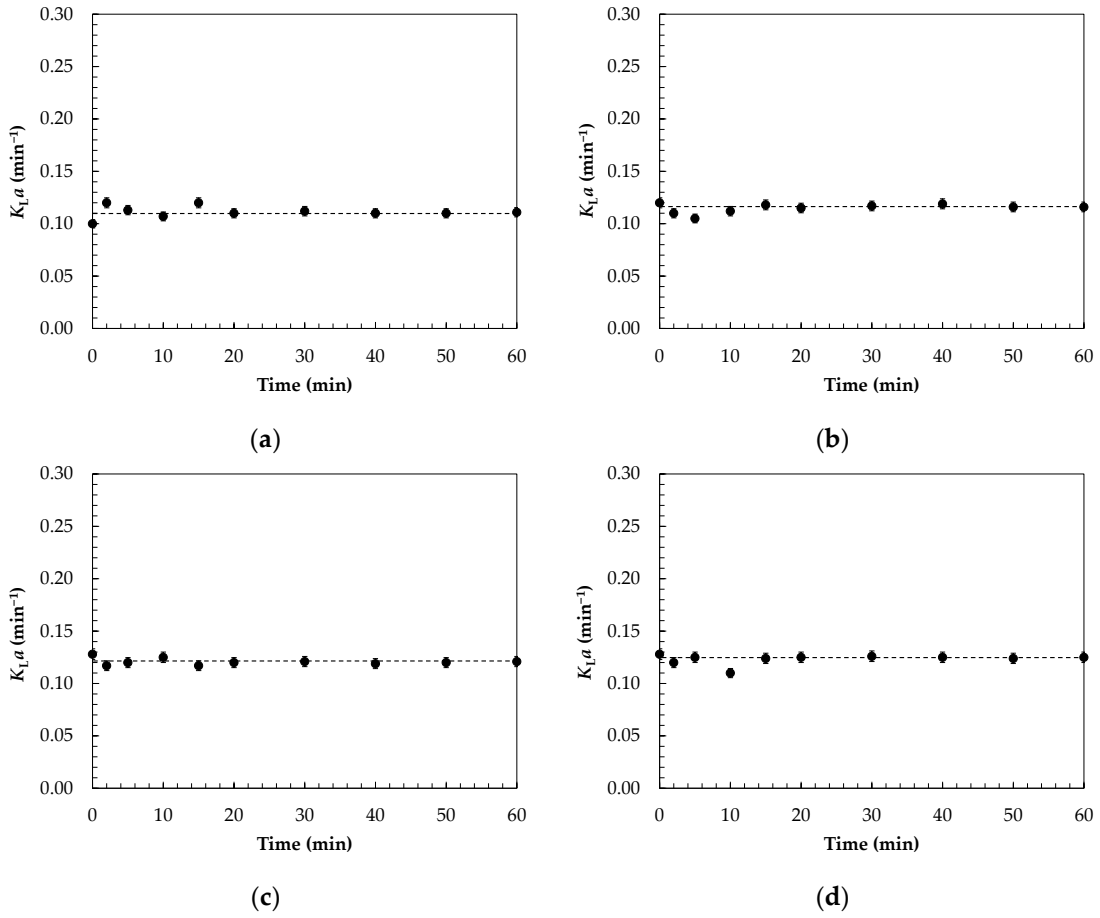

**Figure S2.** Determination of mass transfer coefficient of the experimental system for various pressures: (a) 1.0 atm; (b) 1.5 atm; (c) 2.0 and (d) 2.5 atm. Experimental conditions:  $C_{P_0} = 250.0$  mg L<sup>-1</sup>, pH = 11.0,  $C_{O_3,G} = 12.0$  mg L<sup>-1</sup>,  $Q_L = 12$  mL min<sup>-1</sup>,  $Q_G = 0.05$  L h<sup>-1</sup>,  $V = 0.14$  L.

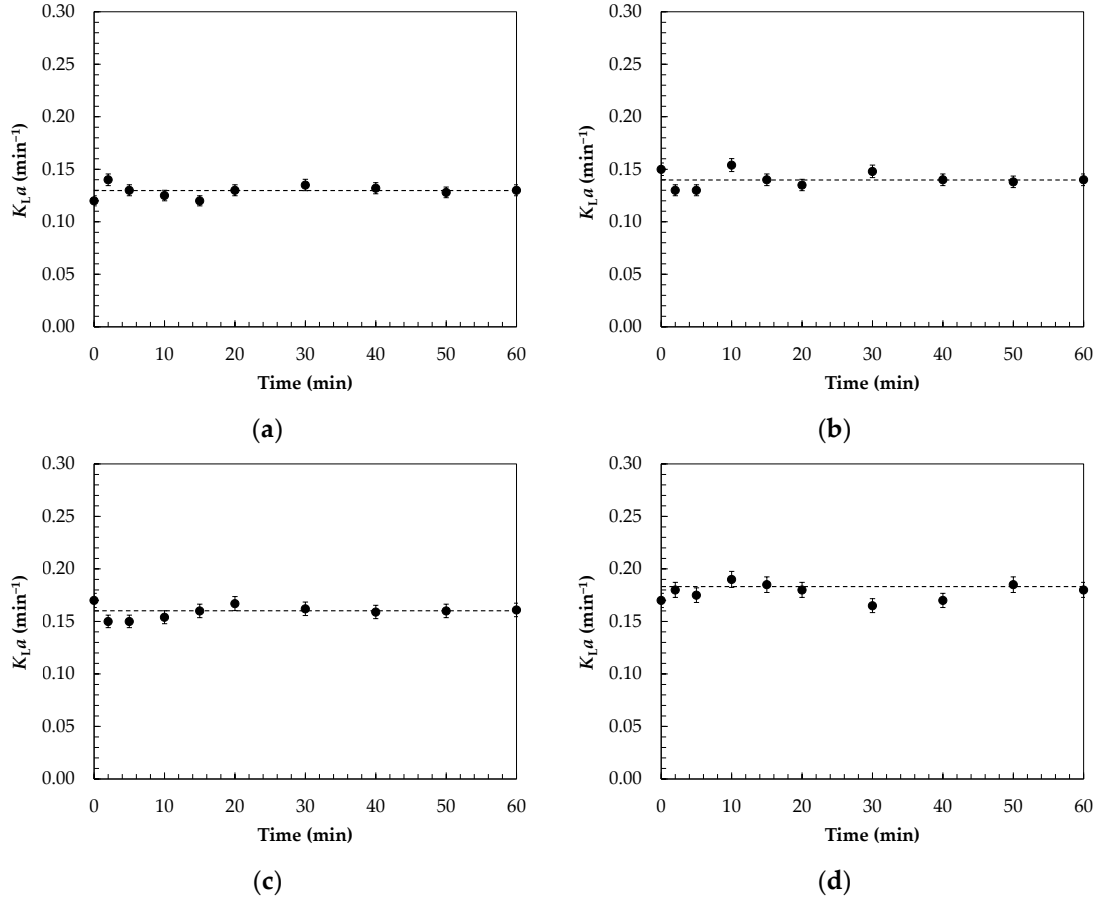

**Figure S3.** Determination of mass transfer coefficient of the experimental system for various ozone flow rates: (a) 0.05 L h<sup>-1</sup>; (b) 0.1 L h<sup>-1</sup>; (c) 0.2 L h<sup>-1</sup> and (d) 0.4 L h<sup>-1</sup>. Experimental conditions:  $C_{P_0} = 250.0$  mg L<sup>-1</sup>; pH = 11.0,  $P = 2.5$  atm;  $C_{O_3,G} = 19.0$  mg L<sup>-1</sup>,  $Q_L = 12$  mL min<sup>-1</sup>,  $V = 0.14$  L.

### 3. Hydroxyl radical generation

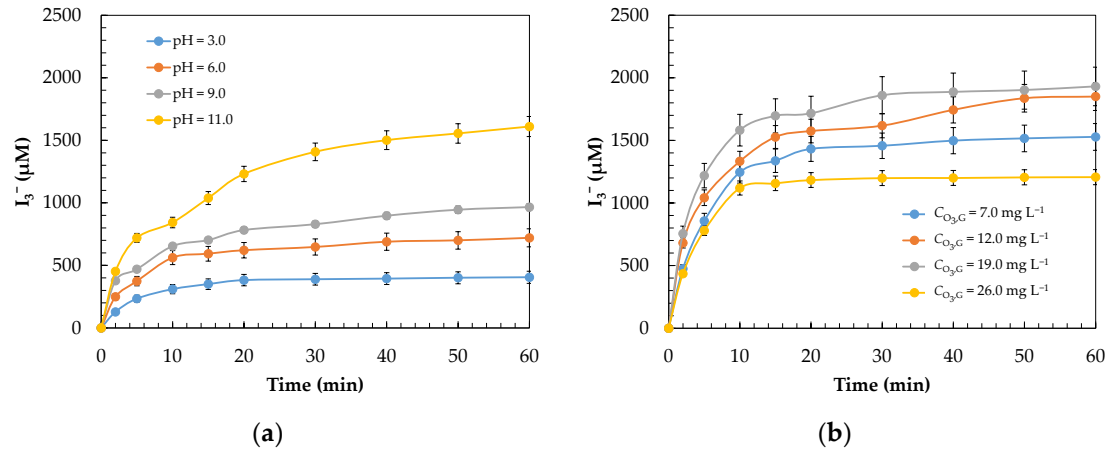

**Figure S4.**  $I_3^-$  concentration as a function of time for 0.1 M KI. Effect of: (a) pH<sup>1</sup> and (b) Ozone dose<sup>2</sup>. Experimental conditions: <sup>1</sup>  $C_{P_0} = 250.0$  mg L<sup>-1</sup>,  $P = 1.0$  atm,  $C_{O_3,G} = 12.0$  mg L<sup>-1</sup>,  $Q_L = 12$  mL min<sup>-1</sup>,  $Q_G = 0.05$  L h<sup>-1</sup>,  $V = 0.14$  L. <sup>2</sup>  $C_{P_0} = 250.0$  mg L<sup>-1</sup>,  $P = 2.5$  atm, pH = 11.0,  $Q_L = 12$  mL min<sup>-1</sup>,  $Q_G = 0.05$  L h<sup>-1</sup>,  $V = 0.14$  L.

#### 4. Oxidation by-products analysis

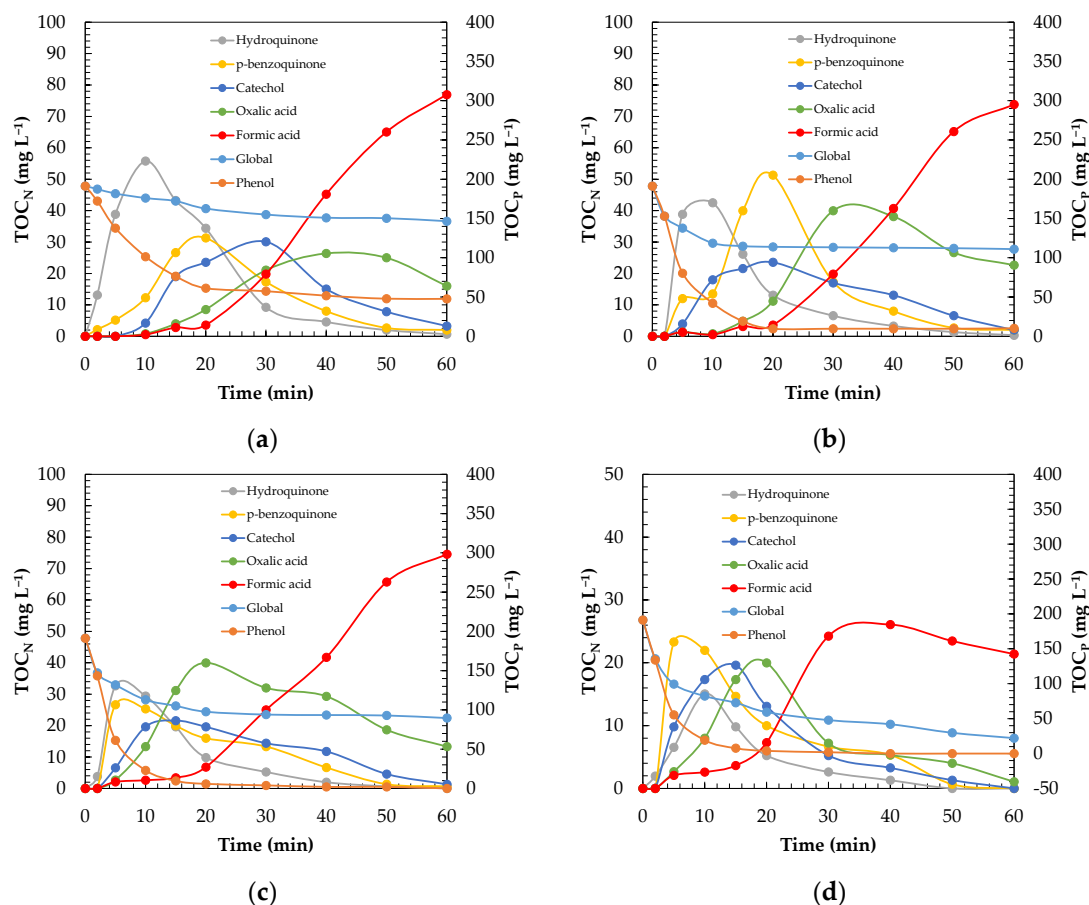

**Figure S5.** Analysis of the main degradation by-products during catalytic ozonation of phenol. Effect of: (a) pH = 3.0; (b) pH = 6.0; (c) pH = 9.0 and (d) pH = 11.0. Experimental conditions:  $C_{P_0} = 250.0 \text{ mg L}^{-1}$ ,  $P = 1.0 \text{ atm}$ ,  $CO_{3,G} = 12.0 \text{ mg L}^{-1}$ ,  $Q_L = 12 \text{ mL min}^{-1}$ ,  $Q_G = 0.05 \text{ L h}^{-1}$ ,  $V = 0.14 \text{ L}$ .

#### References

1. Lin, S.H.; Lai, C.L. Kinetic Characteristics of Textile Wastewater Ozonation in Fluidized and Fixed Activated Carbon Beds. *Water Research* **2000**, *34*, 763–772, doi:10.1016/S0043-1354(99)00214-6.
2. Zaror, C.; Soto, G.; Valdés, H.; Mansilla, H. Ozonation of 1,2-Dihydroxybenzene in the Presence of Activated Carbon. *Water Science and Technology* **2001**, *44*, 125–130, doi:10.2166/wst.2001.0267.
3. Mousavi, S.M.S.; Dehghanzadeh, R.; Ebrahimi, S.M. Comparative Analysis of Ozonation ( $O_3$ ) and Activated Carbon Catalyzed Ozonation (ACCO) for Destroying Chlorophyll a and Reducing Dissolved Organic Carbon from a Eutrophic Water Reservoir. *Chemical Engineering Journal* **2017**, *314*, 396–405, doi:10.1016/j.cej.2016.11.159.
4. Sánchez-Polo, M.; Salhi, E.; Rivera-Utrilla, J.; Gunten, U. von Combination of Ozone with Activated Carbon as an Alternative to Conventional Advanced Oxidation Processes. *Ozone: Science & Engineering* **2006**, *28*, 237–245, doi:10.1080/01919510600714170.
5. Giráldez, I.; García-Araya, J.F.; Beltrán, F.J. Activated Carbon Promoted Ozonation of Polyphenol Mixtures in Water: Comparison with Single Ozonation. *Ind. Eng. Chem. Res.* **2007**, *46*, 8241–8247, doi:10.1021/ie0708881.

6. Alameddine, M.; How, Z.T.; Gamal El-Din, M. Advancing the Treatment of Primary Influent and Effluent Wastewater during Wet Weather Flow by Single versus Powdered Activated Carbon-Catalyzed Ozonation for the Removal of Trace Organic Compounds. *Science of The Total Environment* **2021**, 770, 144679, doi:10.1016/j.scitotenv.2020.144679.
